# Supplementary material for: The Münsterdorf sinkhole cluster: Void origin and mechanical failure
Source: Copernicus journal article supplement (doi:10.5194/egusphere-2022-668), 2022-08-30

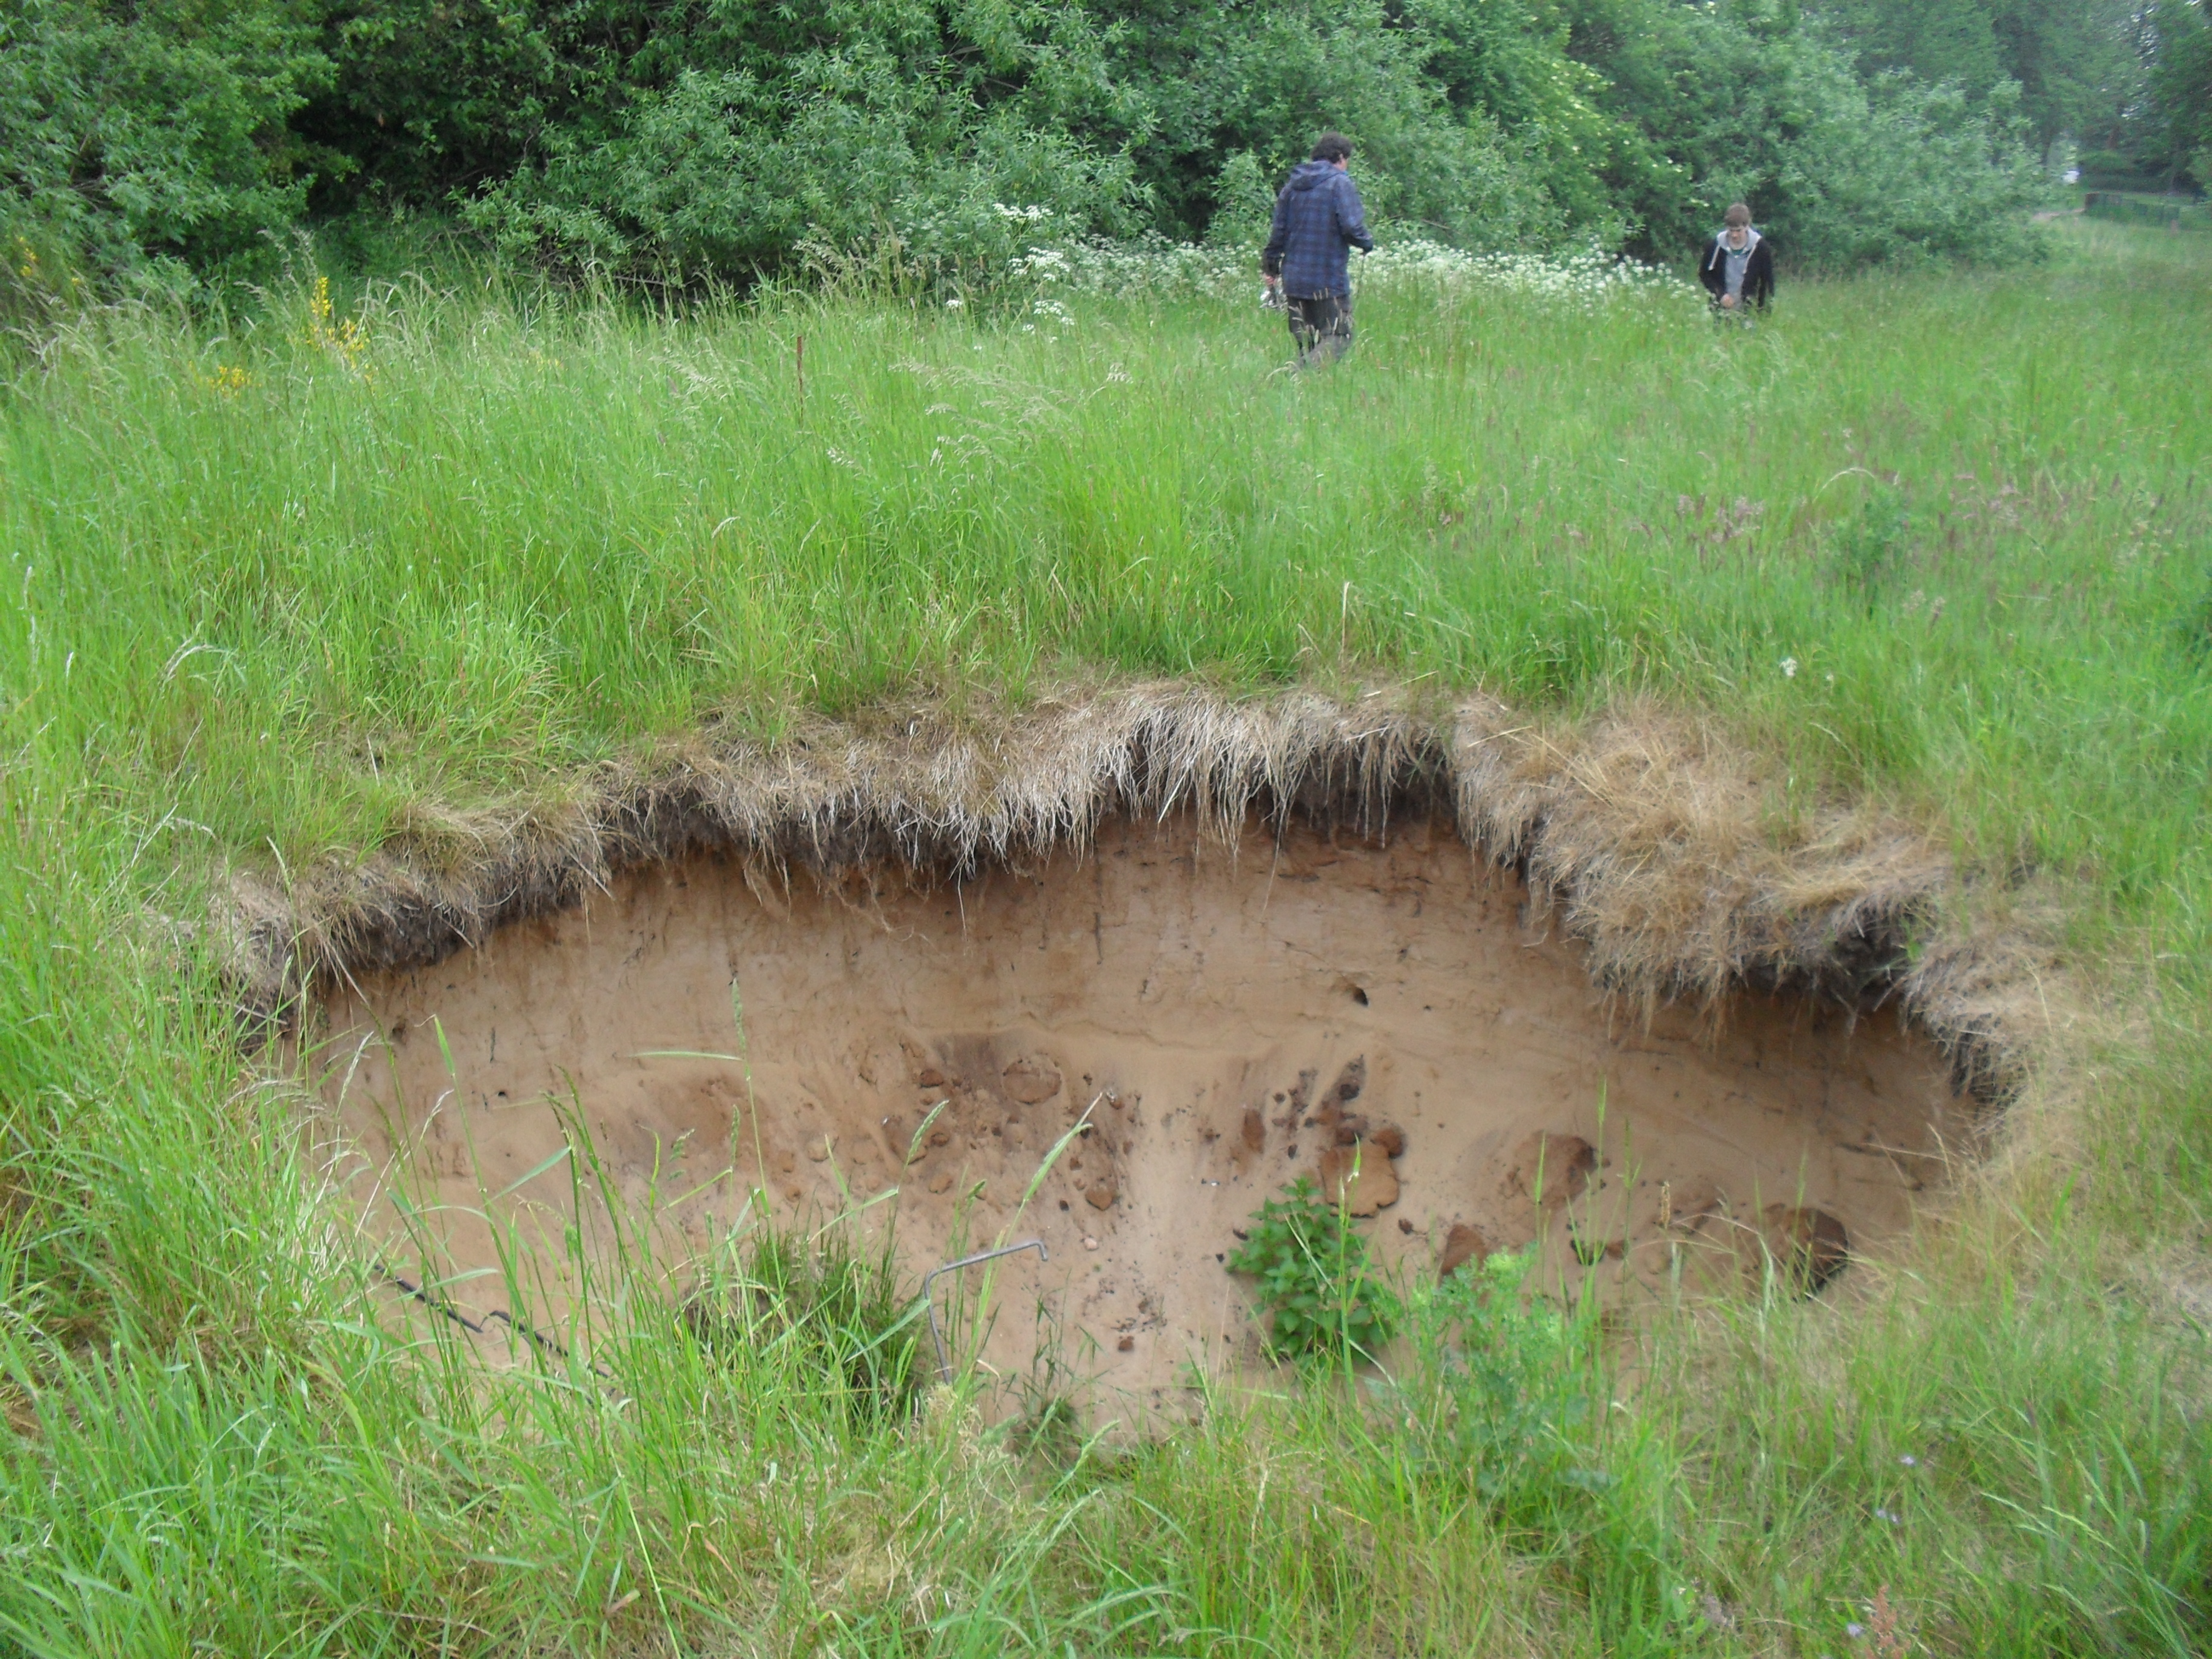

Supplement: Supplementary file [file egusphere-2022-668-AC1-supplement.pdf]
